# Supplementary material
Source: PubMed Central journal article supplement (PMC2330198)
Supplement: NIHMS45414-supplement-01.pdf [file NIHMS45414-supplement-01.pdf]

| <b>COMPOUND</b>    | <b>% purity batch 1</b> | <b>% purity batch 2</b> | <b>% purity batch 3</b> |
|--------------------|-------------------------|-------------------------|-------------------------|
| <b>DMT002218</b>   | 98.7 by ELS             |                         |                         |
| <b>DMT002220</b>   | 95.1 by ELS             |                         |                         |
| <b>DMT002222</b>   | 100 by ELS              |                         |                         |
| <b>DMT002260</b>   | 97.2 by ELS             |                         |                         |
| <b>DMT002262</b>   | 93.4 by ELS             |                         |                         |
| <b>DMT002264</b>   | 97.5 by ELS             | 97.4 by ELS and UV      |                         |
| <b>DMT002272</b>   | 100 by ELS              |                         |                         |
| <b>DMT002286</b>   | 87.8 by ELS             |                         |                         |
| <b>DMT003020</b>   | 97.7 by ELS             |                         |                         |
| <b>DMT003024</b>   | 91.1 by ELS             |                         |                         |
| <b>DMT003034</b>   | 100 by ELS              |                         |                         |
| <b>DMT003036</b>   | 100 by ELS              |                         |                         |
| <b>DMT003038</b>   | 97.5 by ELS             |                         |                         |
| <b>DMT003042</b>   | 95.4 by ELS             | 100 by ELS              |                         |
| <b>DMT003044</b>   | 98.6 by ELS             |                         |                         |
| <b>DMT003047</b>   | 92.5 by ELS             | 100 by ELS              |                         |
| <b>DMT003052</b>   | 98.7 by ELS             |                         |                         |
| <b>DMT003058</b>   | 98.4 by ELS             |                         |                         |
| <b>DMT003082</b>   | 87.3 by ELS             |                         |                         |
| <b>DMT003084</b>   | 99.7 by ELS             |                         |                         |
| <b>DMT003086</b>   | 95 by ELS               |                         |                         |
| <b>DMT003088</b>   | 96.5 by ELS             |                         |                         |
| <b>DMT003090</b>   | 96.7 by ELS             |                         |                         |
| <b>DMT003092</b>   | 93.5 by ELS             |                         |                         |
| <b>DMT003094</b>   | 92.6 by ELS             |                         |                         |
| <b>DMT003096</b>   | 95.3 by ELS             |                         |                         |
| <b>DMT003100</b>   | 97.1 by ELS             |                         |                         |
| <b>DMT003102</b>   | 100 by ELS              |                         |                         |
| <b>DMT003104</b>   | 100 by ELS              |                         |                         |
| <b>DMT003106</b>   | 98.5 by ELS             |                         |                         |
| <b>DMT003108</b>   | 98 by UV                |                         |                         |
| <b>DMT003110</b>   | 99.1 by ELS             |                         |                         |
| <b>DMT003112</b>   | 95.1 by ELS             |                         |                         |
| <b>DMT003114</b>   | 100 by ELS              |                         |                         |
| <b>DMT003116</b>   | 100 by ELS              |                         |                         |
| <b>DMT003132</b>   | 87.1 by ELS             |                         |                         |
| <b>DMT003134</b>   | 91.7 by ELS             |                         |                         |
| <b>MAL1-274</b>    | 100 by UV               | 100 by ELS              | 100 by UV               |
| <b>MAL2-06A</b>    | 95 by UV                | 97 by ELS               | 95 by UV                |
| <b>MAL2-10A</b>    | 78 by UV                | 100 by ELS              |                         |
| <b>MAL2-116-17</b> | 100 by TIC              | 100 by ELS              |                         |
| <b>MAL2-116-20</b> | 95 by UV                | 96.9 by ELS             |                         |
| <b>MAL2-11B</b>    | 100 by UV               | 100 by UV               | 100 by ELS              |
| <b>MAL2-13</b>     | 96 by UV                | 100 by ELS              | 96 by UV                |
| <b>MAL3-101</b>    | no spectrum             | 99.6 by ELS             |                         |
| <b>MAL3-51</b>     | 100 by TIC              | 99.2 by UV              |                         |
